# Divergent Energy Expenditure Impacts Mouse Metabolic Adaptation to Acute High-Fat/High-Sucrose Diet Producing Sexually Dimorphic Weight Gain Patterns

E. Matthew Morris<sup>1\*</sup>, Roberto D. Noland<sup>1</sup>, Julie A. Allen<sup>1</sup>, Colin S. McCain<sup>1</sup>, Qing Xia<sup>2</sup>, Devin C. Koestler<sup>2</sup>, Robin P. Shook<sup>3</sup>, John R.B. Lighton<sup>4</sup>, Julie A. Christianson<sup>5</sup> and John P. Thyfault<sup>1,6</sup>

Dept. of Molecular & Integrative Physiology<sup>1</sup>, University of Kansas Medical Center, Kansas City, Kansas, Dept. of Biostatistics<sup>2</sup>, University of Kansas Medical Center, Kansas City, Kansas, Dept. of Pediatrics<sup>3</sup>, Children's Mercy Hospital, Kansas City, MO, Sable Systems International<sup>4</sup>, North Las Vegas, NV, Dept. of Anatomy & Cell Biology<sup>5</sup>, University of Kansas Medical Center, Kansas City, Kansas, Kansas City VA Medical Center-Research Service<sup>6</sup>, Kansas City, Missouri.

**Running Title:** Energy expenditure impacts weight gain by sex

## Corresponding Author Information

E. Matthew Morris, Ph.D.  
Assistant Professor  
University of Kansas Medical Center  
Department of Molecular & Integrative Physiology  
G011 Wahl Hall East  
Mail Stop 3043  
3901 Rainbow Boulevard  
Kansas City, KS 66160  
+1 913 588-7025  
[emorris2@kumc.edu](mailto:emorris2@kumc.edu)

## Disclosures

J.R.B.L. is President and Chief Technology Officer of Sable Systems International, which designs, manufactures, and supports the Promethion metabolic and behavioral phenotyping system used in this study. No other potential author conflicts of interest are apparent.

## Grants and Support

This work was partially supported by NIH grants K01DK112967 (EMM), P20GM103418 (EMM), and R01KD121497 (JPT) and VA Merit grant 1101BX002567 (JPT).

## Highlights

- Utilized ambient temperature differences as an experimental tool to study the impact of divergent baseline energy expenditure on metabolic adaptation to high-fat, high-sucrose diet.
- Baseline energy expenditure and sex interact to impact diet-induced changes in body composition and weight gain.
- The energy expenditure and sex interaction is a result of an inverse relationship between fat mass gain and weight-adjusted total energy expenditure, as well as, diet-induced non-shivering thermogenesis.
- These data support that the hypothesis that higher energy expenditure amplifies the coupling of energy intake to energy expenditure during energy dense feeding, resulting in reduced positive energy balance and reduced gains in weight and adiposity.
- First evidence that energy expenditure level plays a role in the composition of weight gained by female mice during acute HFHS feeding.
- This study further highlights issues with obesity/energy metabolism research performed in mice at sub-thermoneutral housing temperatures, particularly with sex comparisons.

## GRAPHIC ABSTRACT

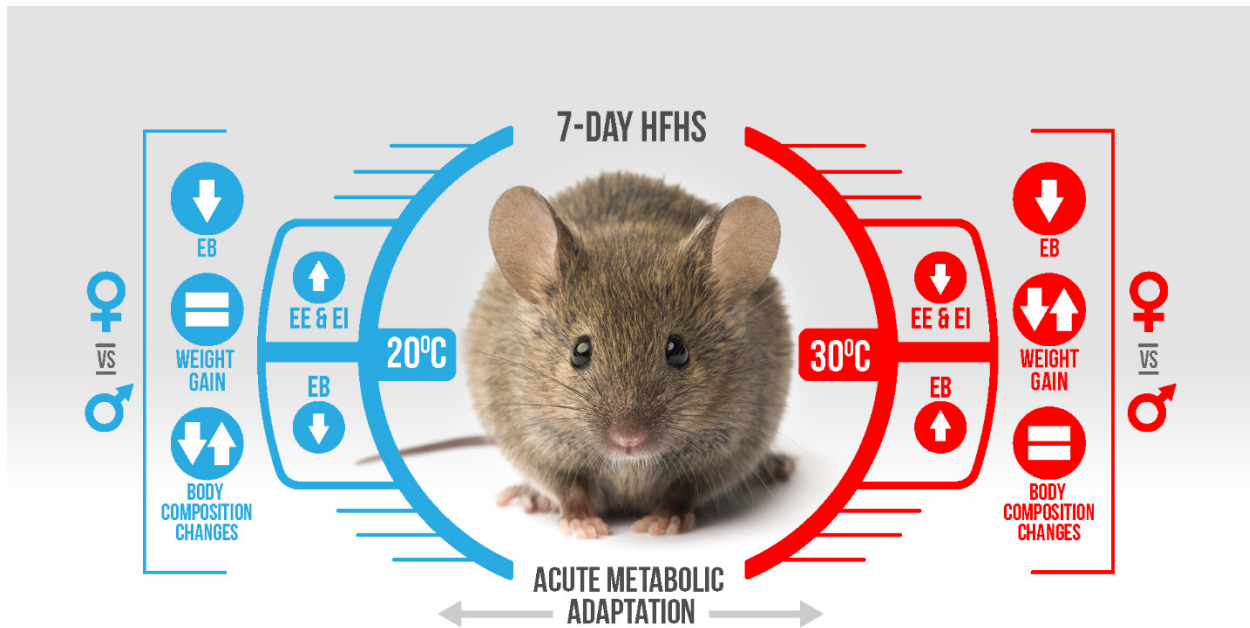

**Legend:** Male and female mice housed at 30°C had lower energy expenditure (EE) & energy intake (EI), while having greater energy balance (EB), during 7-day high-fat/high-sucrose (HFHS) feeding compared to male and female mice, respectively, housed at 20°C. However, female mice had lower EB compared to males at both housing temperature. Female mice housed at 30°C gained less weight than 30°C males but gained the same relative amount of fat mass during acute HFHS feeding. Interestingly, 20°C females gained the same amount of weight as 20°C males but gained primarily fat-free mass, while the males gained the same proportion of fat as 30°C males and females.

## KEYWORDS

weight gain, body composition, energy balance, energy expenditure, sexual dimorphism

1 **ABSTRACT**

2 **Objective:** Long-term weight gain can result from cumulative small weight increases due to  
3 short-term excess caloric intake during weekends and holidays. Increased physical activity may  
4 mediate weight gain through increases in energy expenditure (EE) and reductions in energy  
5 balance. Current methods for modulating mouse EE (e.g. – exercise, chemical uncouplers, etc.)  
6 have confounding effects. However, it is known that mouse EE linearly increases as housing  
7 temperature decreases below the thermoneutral zone. **Methods:** To determine how robust  
8 differences in baseline EE impact 7-day changes in weight and body composition on low-fat and  
9 high-fat, high-sucrose (HFHS) diets, we performed indirect calorimetry measurements in male  
10 and female mice housed at divergent temperatures (20°C vs. 30°C). **Results:** As expected,  
11 mice housed at 30°C have ~40% lower total EE and energy intake compared to 20°C mice  
12 regardless of diet or sex. Energy balance was increased with HFHS in all groups, with ~30%  
13 greater increases observed in 30°C versus 20°C mice. HFHS increased weight gain regardless  
14 of temperature or sex. Interestingly, no HFHS-induced weight gain differences were observed  
15 between females at different temperatures. In contrast, 30°C male mice on HFHS gained ~50%  
16 more weight than 20°C males, and ~80% more weight compared to 30°C females. HFHS  
17 increased fat mass across all groups but 2-fold higher gains occurred in 30°C mice compared to  
18 20°C mice. Females gained ~35% less fat mass than males at both temperatures.

19 **Conclusions:** Together, these data reveal an interaction between divergent ambient  
20 temperature-induced EE and sex that impacted diet-induced patterns of short-term weight gain  
21 and body composition.

## 22 1. INTRODUCTION

23 Obesity can occur through episodic periods of weight gain caused by consumption of energy  
24 dense foods during weekends, holidays, or seasons [1-5]. Simply stated, weight gain occurs in a  
25 given time frame when the difference in energy intake exceeds energy expenditure resulting in a  
26 positive energy balance [6]. This positive energy balance represents a shift in the flux of energy  
27 consumed from expenditure to storage [6-8], comprised primarily of increased fat mass [9].  
28 Previous research shows that a complex combination of hedonic, hormonal, metabolic, and  
29 sexually dimorphic regulatory mechanisms can alter energy intake and/or energy expenditure  
30 [10-13], but the integrated mechanisms that regulate episodic weight gain during acute periods  
31 of energy dense feeding remain unclear.

32 Current recommendations to prevent weight gain and treat obesity include increasing  
33 physical activity or daily exercise with a goal of increasing total energy expenditure (TEE) and  
34 improving energy balance [14-18]. Improved energy balance at higher physical activity levels is  
35 proposed to be achieved through greater coupled sensitivity of energy intake regulation to  
36 energy expenditure [6, 8]. However, increased physical activity produces multiple systemic and  
37 tissue-specific adaptations independent of EE (reviewed in [19-21]), complicating the direct  
38 investigation of modulating EE to protect against diet-induced weight gain. Additionally,  
39 observed sex differences in physical activity levels and physiological adaptation may impact  
40 weight gain prevention and/or obesity treatment [22, 23]. To more specifically study the impact  
41 of total EE (TEE) on acute diet-induced weight gain we leveraged the ability of divergent  
42 housing temperatures to cause grossly different EE in male and female mice before exposing  
43 them to a subsequent metabolic challenge (7-day high-fat/high-sucrose feeding). We utilized  
44 indirect calorimetry and EchoMRI to assess changes in energy metabolism, weight gain, and  
45 body composition to the diet. We hypothesized that higher TEE would provide protection against  
46 acute diet-induced weight gain, but that sexual dimorphic responses would emerge. We

47 revealed that only male mice gained more weight at a low TEE, whereas females gained the  
48 same weight regardless of TEE. However, female mice at low TEE gained the same proportion  
49 of fat mass as males, while females at higher TEE gained primarily fat-free mass.

50

## 51 **2. MATERIALS and METHODS**

### 52 **2.1 Animals**

53 Male and female C57Bl/6J (#000664, Jackson Laboratories, Bar Harbor, ME, USA) mice (6-  
54 weeks old) were individually housed at either 20°C or 30°C on a reverse light cycle (light 10P –  
55 10A) with *ad lib* access to low-fat, control diet [LFD, D12110704 (10% kcal fat, 3.5% kcal  
56 sucrose, 3.85 kcal/gm), Research Diets, Inc., New Brunswick, NJ, USA] for three weeks. At 9-  
57 weeks of age, animal weights and food weight was monitored prior to and following the 7 days  
58 of both LFD and the subsequent high-fat, high-sucrose diet [HFHS, D12451, 45% kcal fat, 17%  
59 kcal sucrose, 4.73 kcal/gm] at the assigned ambient temperature. At the end of the HFHS 7-day  
60 feeding, mice were food withdrawn for 2hrs (0800). The animal protocols were approved by the  
61 Institutional Animal Care and Use Committee at the University of Kansas Medical Center and  
62 the Subcommittee for Animal Safety at the Kansas City Veterans' Hospital.

63

### 64 **2.2 Body Composition Analysis**

65 Body composition was measured by qMRI using the EchoMRI-1100 (EchoMRI, Houston, Texas,  
66 USA). Fat free mass (FFM) was calculated as the difference between body weight and fat mass  
67 (FM). Body composition was determined prior to, and after each of the 7-day feedings.

68

### 69 **2.3 Indirect Calorimetry, Energy Metabolism, & Behavior Analysis**

70 Starting at 9-weeks of age (n=12), energy metabolism was assessed at 20°C or 30°C ambient  
71 temperature for 7 days on LFD followed by 7 days of HFHS by measuring VO<sub>2</sub> and VCO<sub>2</sub> in a  
72 Promethion continuous metabolic monitoring system (Sable Systems International, Las Vegas,

73 NV, USA), as described previously [24, 25]. Animals were acclimated to the indirect calorimetry  
74 cages for 5 days prior to initiation of data collection. Rate of energy expenditure was calculated  
75 with a modified Weir equation [EE (kcal/hr) =  $60 \times (0.003941 \times \text{VO}_2 + 0.001106 \times \text{VCO}_2)$ ], and  
76 respiratory quotient (RQ) as  $\text{VCO}_2/\text{VO}_2$ . Total energy expenditure (TEE) was calculated as the  
77 daily average rate of energy expenditure for each day times 24 and summed across the 7 days  
78 of each diet. Resting energy expenditure (REE) was calculated from the average rate of EE  
79 during the 30-minute period with the lowest daily EE as kcal/hr and extrapolated to 24hrs and  
80 summed across the 7 day dietary periods. Non-resting energy expenditure (NREE) was  
81 calculated as the difference between TEE and REE. 7-day average diurnal change in RQ was  
82 calculated as the difference in daily average of the dark cycle RQ minus the light cycle RQ for  
83 each diet. Diet-induced changes in RQ, REE, and NREE were calculated as the difference in  
84 the 7-day HFHS data minus the 7-day LFD data. Energy intake (EI) was calculated as the total  
85 food intake for each feeding period times the energy density of each diet. Energy balance (EB)  
86 was calculated as the difference between the total EI and TEE throughout each 7-day dietary  
87 exposure period. FI, EI, and EB data during HFHS feeding from two 20°C female mice was not  
88 included in data analysis due to excessive food spillage. Percent metabolic efficiency was  
89 calculated as:  $(\text{change in fat mass (kcal)} + \text{change in lean mass (kcal)})/\text{EI}$ , where the energy  
90 content for fat and lean mass was 9.32 kcal/g & 1.19 kcal/g, respectively [26]. Thermic effect of  
91 food (TEF) was determined from the consensus thermic effect of food for fat (2.5%),  
92 carbohydrate (7.5%), and protein (25%), and the manufacturer provided diet information for  
93 each diet [27, 28]. As such, the TEF for LFD (D12110704, Research Diets, 3.85 kcal/g, 10%  
94 kcals fat, 65% kcal carbohydrate, 20% kcals protein) is 10.5% or 0.4043 kcal/g, and HFHS  
95 (D12451, Research Diets, 4.73 kcal/g, 45% kcals fat, 35% kcal carbohydrate, 20% kcals  
96 protein) is 8.75% or 0.4139 kcal/g. This method of calculating TEF reduces the potential  
97 influence of neurobehavioral adaptations of the fed/fasted transition impacting changes in EE,  
98 through calculation of TEF across the entire 7-day period of each diet. Activity energy

99 expenditure (AEE) was calculated as the difference between NREE and TEF. All\_Meters is an  
100 assessment of cage activity including gross and fine movements; and is determined using the  
101 summed distances calculated from the Pythagoras' theorem that the mouse moved since the  
102 previous data point based on XY second by second position coordinates. Cost of movement  
103 (CoM) was calculated as the AEE divided by total meters traveled over the 7-days of each diet.  
104 LFD data for 4 additional male and female mice at 30°C is included, no HFHS was collected for  
105 this subset as ambient temperature control was lost. All data from one 20°C female mouse was  
106 excluded after discovering malocclusion at necropsy.

107

## 108 **2.4 Statistical Analysis**

109 Data are presented as scatter plots with means and standard error. The two-standard deviation  
110 test was utilized to test for outliers in each group. Utilizing R statistical programming language  
111 version 3.5.1, (<http://r-project.org>), a series of linear mixed effects models were used to assess  
112 the relationship between anthropometric and energy metabolism measures with temperature  
113 (30°C/20°C), sex (Male/Female), and diet (LFD/HFHS). Linear effects models were fit to  
114 anthropometric and energy metabolism measures and included fixed effects terms representing  
115 the main effects of temperature, sex, and diet, all two-way interactions involving these terms  
116 and their three-way interactions, and a random intercept term for mouse to account for the  
117 anticipated autocorrelation given that multiple measurements were collect on the same mice.  
118 Models were additionally adjusted for fat mass and fat-free mass to control for their potential  
119 confounding effects. Adjusted means and partial eta-squared values as approximations of  
120 effect size were calculated. Additionally, parameter estimates obtained from the linear mixed  
121 models along with linear comparisons were conducted and adjusted for multiple comparisons  
122 using a Bonferroni correction. Main effects are discussed only when all pairwise treatment  
123 comparisons within that parameter were significant. Diet-induced changes were calculated as  
124 the difference in 7-day total of each variable during HFHS minus the LFD 7-day total. A two-way



125 ANOVA was utilized to determine main effects of temperature and sex in diet-induced change  
126 data. Where significant main effects were observed, post hoc analysis was performed using  
127 least significant difference to test for any specific pairwise differences using SPSS version 25  
128 (SPSS Inc., Armonk, New York). Statistical significance was set at  $p < 0.05$ .

129

### 130 **3. RESULTS**

#### 131 **3.1 Systemic Energy Metabolism**

132 Indirect calorimetry was utilized to investigate the role of differences in EE on systemic  
133 energy metabolism and HFHS-induced weight-gain in mice housed at 30°C versus 20°C. TEE  
134 was ~40% lower in 30°C mice of both sexes and diets compared to 20°C (Figure 1A,  $p < 0.0001$ ),  
135 driving a significant 3-way interaction ( $p < 0.0001$ ). Additionally, HFHS feeding increased TEE  
136 ~5-15% in all groups ( $p < 0.0001$ ). Female mice had lower TEE compared to males ( $p < 0.05$ )  
137 except in the 20°C, HFHS-fed condition. 7-day EI was greater in 20°C mice on LFD and HFHS  
138 (~55% & ~32%, respectively) compared to 30°C regardless of sex (Figure 1B,  $p < 0.0001$ ). As  
139 expected, EI increased on HFHS compared to LFD across all groups ( $p < 0.0001$ ). The 30°C  
140 females and males increased EI 44% & 63%, respectively during HFHS feeding; while 20°C  
141 mice increased ~34%. Females were observed to have lower EI ( $p < 0.006$ ) in all contrasts  
142 except 30°C LFD. EB was calculated as the difference in 7-day EI and TEE. While no difference  
143 in EB was observed during LFD feeding in either sex or temperature (Figure 1C), a significant  
144 increase in EB was induced by HFHS in all groups ( $p < 0.001$ ). Additionally, HFHS feeding  
145 resulted in lower EB in female mice housed at both 20°C & 30°C (~30%,  $p < 0.01$ ). Further, 30°C  
146 housing produced greater EB during HFHS feeding in both male and female mice (25% & 45%,  
147 respectively,  $p < 0.01$ ).

148 Initial body weights were not different between mice housed at 20°C vs. 30°C, with females  
149 weighing ~25% less than males in both temperature groups. All initial, end of LFD (Day 7), and  
150 end of HFHS (Day 14) anthropometric data is presented in Supplemental Table A.1. Body

151 weight gain during the 7-days of LFD was 3.6- and 2.3-fold higher (males and females,  
152 respectively) housed at 30°C compared to 20°C (Figure 1D,  $p<0.04$ ). No difference in weight  
153 gain was observed between sexes on LFD at either temperature. Subsequent HFHS feeding  
154 resulted in a significant interaction of temperature by sex by diet ( $p<0.001$ ). This interaction was  
155 primarily driven by the main effect of HFHS on weight gain regardless of temperature or sex  
156 ( $p<0.05$ ). Interestingly, temperature did not effect weight gain in HFHS-fed female mice;  
157 whereas, HFHS-fed male mice housed at 30°C gained ~65% more weight compared to 20°C  
158 males ( $p<0.05$ ). Moreover, the 30°C male mice gained ~80% more weight compared to females  
159 at 30°C ( $p<0.05$ ).

160

### 161 **3.2 Changes in Body Composition**

162 We utilized qMRI to assess how baseline differences in EE impacted changes in body  
163 composition. Greater fat mass (FM) gain was observed at 30°C during the LFD (Figure 2A,  
164  $p<0.0001$ ) and a further increase was induced by HFHS feeding ( $p<0.0001$ ). Transition to HFHS  
165 resulted in ~50% & ~70% less FM gain in female mice compared to male mice at 20°C & 30°C,  
166 respectively ( $p<0.0001$ ). Importantly, 30°C housing resulted in much greater increases in FM on  
167 HFHS (64% & 2.8-fold increases in males and females, respectively) compared to 20°C  
168 ( $p<0.0001$ ). In contrast to FM, temperature had no impact on changes in fat-free mass (FFM)  
169 during LFD (Figure 2B). Interestingly, FFM increased in female 20°C mice on HFHS compared  
170 to male 20°C (2.6-fold,  $p<0.0001$ ) and female 20°C mice fed LFD (85%,  $p<0.005$ ). Additionally,  
171 change in FFM was less in 30°C female mice compared to 20°C female and 30°C male mice  
172 (~65%,  $p<0.0006$  & ~40%,  $p<0.04$ , respectively). To further highlight the interaction of sex,  
173 temperature, and diet in short-term weight gain and type of weight gained, Figure 2C displays  
174 the one week change in body weight as the components of FM and FFM gained. The metabolic  
175 efficiency was calculated as the sum of the stored energy from change in FM and lean mass  
176 divided by EI (Figure 2D) [26]. Calculated percent metabolic efficiency shows a similar pattern to

177 the FM data (Figure 2A). Importantly, the difference in metabolic efficiency between temperature  
178 groups on HFHS increased to 2.2-fold for males & 3.7-fold for female mice ( $p < 0.0001$ ).  
179 Together, these data demonstrate an interaction of sex, temperature, and dietary exposure to  
180 impact changes in body composition, particularly, in female animals.

181

### 182 **3.3 Component Analysis of TEE**

183 To better characterize the interaction of temperature, sex, and diet on systemic energy  
184 metabolism, TEE was dissected into resting (REE) and non-resting (NREE) components (Figure  
185 3A & B, respectively). Where REE is primarily comprised of basal metabolic rate and non-  
186 shivering adaptive thermogenesis, and NREE encompasses the thermic effect of food and  
187 activity-induced EE. A significant 3-way interaction of temperature\*sex\*diet ( $p < 0.0009$ ) was  
188 observed for REE, driven by the ~55% reduction in REE in 30°C mice regardless of sex or diet  
189 ( $p < 0.0001$ ). HFHS feeding resulted in an ~15-25% increase in REE across all groups  
190 ( $p < 0.0001$ ). Female mice had ~10% lower NREE compared to males on LFD ( $p < 0.02$ ). The  
191 transition to HFHS reduced NREE ~15% in 20°C male and female mice ( $p < 0.0001$ ). However,  
192 30°C mice did not lower NREE after a transition to the HFHS. TEE is graphically represented in  
193 Figure 3C as the components REE and NREE to more clearly visualize each component's  
194 absolute amount during different temperature and diet conditions. Additionally, the percent of  
195 TEE for REE and NREE is presented in Figure 3D. Main effects of temperature ( $p < 0.0001$ ) and  
196 diet ( $p < 0.0001$ ) were observed for percent REE regardless of sex. For both sexes, REE  
197 comprised ~70% of TEE at 20°C compared to ~53% at 30°C on LFD. On HFHS, REE  
198 comprised ~78% and 58% of TEE for 20°C and 30°C, respectively.

199

### 200 **3.4 Co-variate Analysis of Energy Metabolism**

201 Co-variate analysis of the energy metabolism outcomes was performed to assess the effect  
202 of differences in the components of body weight (FM and FFM) on the interpretation of TEE and

203 EI. Adjusted estimated marginal means and partial eta squared values are shown in Figure 4.  
204 Following ANCOVA to adjust for differences in fat- and fat-free mass, females had higher TEE  
205 in all diet X temperature comparisons (Figure 4A,  $p < 0.01$ ). Main effects of temperature and diet  
206 were observed as in the absolute TEE data (Figure 1A). Importantly, FM was not a significant  
207 co-variate of TEE; while FFM was significant ( $p < 0.001$ ) and showed a moderate effect size  
208 (partial eta-squared – 0.38) on TEE. Adjustment of EI removed all differences between males  
209 and females (Figure 4B), while maintaining the previously observed (Figure 1B) main effects for  
210 temperature and diet. Again, FM was not a significant co-variate, and while FFM was significant  
211 ( $p < 0.05$ ), a very small effect size was observed (partial eta-squared – 0.07).

212

### 213 **3.5 HFHS-induced Changes in Energy Metabolism**

214 To further assess the roles of temperature and sex on diet-induced changes in energy  
215 metabolism, we quantified substrate utilization (respiratory quotient, RQ), metabolic flexibility,  
216 and within animal EE adaptations following the transition to HFHS. Daily average respiratory  
217 quotient (RQ) was significantly reduced in all groups fed HFHS as expected (Figure 5A,  
218  $p < 0.0001$ ). No significant contrasts were observed for temperature during either LFD or HFHS  
219 feeding, and only 30°C females were significantly lowered by HFHS compared to male mice  
220 ( $p < 0.004$ ). We calculated two measures of metabolic flexibility, which represents the capacity to  
221 adapt substrate utilization based on changes in physiological state [10, 29]. First, we quantified  
222 the daily average difference between dark and light cycle RQ (Figure 5B). LFD mice at 30°C  
223 have reduced change in diurnal RQ compared to 20°C ( $p < 0.005$ ); demonstrating that mice  
224 housed at 30°C are inherently less metabolically flexible. Additionally, HFHS further lowered  
225 average diurnal RQ ( $p < 0.002$ ) in all groups; indicating that short-term HFHS feeding was  
226 sufficient to exacerbate metabolic inflexibility. Interestingly, no difference in sex was observed  
227 across any of the comparisons. Second, the capacity of diet to alter substrate utilization was  
228 also assessed as the change in daily average RQ from LFD to HFHS (Figure 5C). 30°C mice

229 showed a smaller HFHS diet-induced reduction in daily average RQ compared to 20°C mice  
230 ( $p < 0.0001$ ). However, 30°C female mice had greater HFHS diet-induced changes in RQ  
231 compared to males ( $p < 0.02$ ). Figure 5D shows the average change in daily RQ during the  
232 transition from LFD to HFHS. The figure highlights the rapid RQ decrease in all groups and  
233 slower transient response of the 30°C mice.

234 Diet-induced non-shivering thermogenesis is the adaptive capacity to increase EE in  
235 response to increases in EI and is a compensatory mechanism for limiting increased EB during  
236 transitions to energy dense diets [30]. We assessed HFHS-induced changes in EE outcomes as  
237 the difference in the 7-day HFHS minus 7-day LFD data. In Figure 6A, 20°C female mice had a  
238 ~75% greater HFHS-induced increase in TEE compared to males ( $p < 0.0001$ ), and a 2.8-fold  
239 greater increase compared to 30°C females ( $p < 0.0001$ ). Interestingly, no difference was  
240 observed between male mice due to temperature. Further, diet-induced changes in the major  
241 components of TEE were also observed. Diet-induced REE in 30°C male and female mice was  
242 47% and 69% lower, respectively, compared to 20°C (Figure 6B,  $p < 0.0001$ ). Additionally, 20°C  
243 females had ~25% greater diet-induced REE compared to males ( $p < 0.002$ ). Figure 6D depicts  
244 the daily increase in REE due to HFHS feeding and demonstrates the rapid and sustained  
245 responses observed across the 7-day intervention. Finally, a main effect of temperature is  
246 observed for diet-induced change in NREE in part due to the lack of change in mice at 30°C  
247 (Figure 6C,  $p < 0.0001$ ). Furthermore, 20°C female mice demonstrated ~40% less reduction in  
248 NREE due to HFHS feeding compared to males ( $p < 0.0001$ ). These data demonstrate that sex,  
249 baseline differences in EE, and diet interact to impact metabolic flexibility and adaptive  
250 thermogenic responses in EE in mice.

251

### 252 **3.6 Activity Components of Energy Metabolism**

253 Under the sedentary cage conditions of the current study, all activity EE (AEE) would  
254 represent non-exercise spontaneous activity. AEE is calculated as the difference in 7-day NREE

255 and the 7-day TEF for each diet (Figure 7A). As TEF is calculated based on food intake and  
256 macronutrient composition [27], the data is relatively similar to EI (Figure 1B) with the primary  
257 findings being reduced TEF due to temperature for both LFD and HFHS ( $p < 0.0001$ ) and greater  
258 for all HFHS groups ( $p < 0.002$ ). HFHS reduced AEE (Figure 7b) regardless of sex (~40% and  
259 ~15%, 20°C and 30°C, respectively,  $p < 0.0005$ ). However, the reduction in AEE for 30°C males  
260 and females was ~60% greater compared to 20°C mice ( $p < 0.0001$ ). Interestingly, the observed  
261 differences in AEE were not associated with any main effect differences in activity level (Figure  
262 7C). This would suggest a difference in the energy cost of movement (CoM) (Figure 7D), which  
263 is calculated here as the AEE per meter of movement in the cage. Interestingly, females had  
264 lower CoM in all comparisons ( $p < 0.01$ ), suggesting that female mice are inherently more  
265 efficient during cage-based movement. Also, HFHS reduced CoM in male (38%) and female  
266 (31%) 20°C mice compared to LFD ( $p < 0.0001$  &  $p < 0.006$ , respectively). Male and female 30°C  
267 HFHS-fed mice had 30% ( $p < 0.01$ ) & 50% ( $p < 0.005$ ) greater CoM (respectively) compared to  
268 20°C showing that housing temperature impacts energy efficiency of movement robustly.  
269 Importantly, while these data highlight sex differences in the EE phenotypes during HFHS, there  
270 is no obvious association between activity or AEE with changes in body weight or body  
271 composition with acute HFHS feeding.

272

#### 273 4. DISCUSSION

274 Energy expenditure putatively plays a fundamental role in driving both susceptibility for  
275 weight gain and treatment of obesity. However, the direct assessment of the role of EE on EB  
276 and weight gain is complicated by potentially confounding factors produced by the common  
277 experimental tools available (e.g. – physical activity, chemical uncouplers, etc.). There have  
278 also been limited studies examining the links between sex, EE, and weight gain regulation. As a  
279 novel experimental tool to assess the independent role of EE on weight gain, we have utilized  
280 differing ambient housing temperatures (20 vs. 30°C) to modulate EE. Our primary findings are

281 that housing temperature induced divergence in TEE and REE, and interacted with acute HFHS  
282 feeding to produce sexually dimorphic changes in body weight and body composition in  
283 C57Bl/6J mice. While male mice with lower EE gained more weight during 7-day HFHS feeding  
284 than their counterparts with higher EE, no difference was observed between female mice  
285 groups with different EE. Interestingly, all male mice, and female mice with lower EE gained the  
286 same relative proportion of weight as fat, however, the female mice with higher EE gained  
287 primarily FFM. The changes in adiposity during HFHS feeding were highly associated with the  
288 observed EB. Further, the reduced diet-induced adiposity in female mice with greater EE was  
289 associated with enhanced HFHS diet-induced changes in RQ and non-shivering thermogenesis.  
290 Importantly, while total activity was higher in females, neither activity-induced EE or feeding  
291 patterns appear to be associated with sex differences in weight gain and body composition.

292 EB is not a simple static equation but is rather a dynamic system with EI and EE continually  
293 regulating one another to influence thermoregulation and body mass [6-8]. It has been proposed  
294 that mammalian physiology has evolved such that optimal maintenance of EB and body weight  
295 is achieved at higher levels of EE [6-8]. Jean Mayer was the first to demonstrate in rodents and  
296 humans that EB is more highly regulated at higher levels of EE (as increased physical activity),  
297 establishing a coupling of EI and EE within certain limits [31, 32]. This work has been extended  
298 to describe a zone in which EI and EE are highly coupled (regulated zone), below and above  
299 which the components become uncoupled (unregulated zone) [33]. It is proposed that more  
300 individuals live within this unregulated zone as a consequence of rising levels of sedentary  
301 behavior and physical inactivity. In the current study, greater EE was associated with lower EB  
302 during HFHS feeding. Furthermore, the greater weight adjusted EE observed in female mice  
303 was associated with reduced EB compared to males housed at both ambient temperatures. In  
304 our previous work in rats selectively bred for divergence in intrinsic aerobic capacity, male rats  
305 with higher weight adjusted EE also had lower EB following the transition to HFHS diet [34]. In  
306 this study, the reduced EB in the 20°C mice was due in part to the smaller HFHS-induced

307 increases in EI compared to 30°C (~45% vs ~90%, respectively). While EI during HFHS feeding  
308 was lower in female mice at both temperatures, this difference was likely entirely due to the sex  
309 difference in body weight. Weight adjusted EI was not different by sex in any of the temperature  
310 by diet groups. Changes in food intake patterns or behavior may impact EI and weight gain,  
311 however; only the 30°C mice with lower EE had significantly higher food intake on the 7-day  
312 HFHS compared LFD (Supplemental Figure 1). Further, while differences in feeding behavior  
313 during short-term exposure to the HFHS diet between mice with different EE were observed  
314 (Supplemental Figure 1), no association between feeding patterns and the observed HFHS-  
315 induced weight gain was observed. These data support recent human findings where greater  
316 maintenance of EB exists at higher EE levels due to enhanced EI regulation impacting weight  
317 gain [35-37].

318       Between 60 – 80% of weight gained during most periods of positive EB is fat mass [9].  
319 Considerable sexual dimorphism has been observed in the amount and anatomical location of  
320 fat mass gained during hypercaloric conditions [38, 39]. In general, women tend to have higher  
321 percent body fat than men, and greater fat deposition in subcutaneous depots. Further, while  
322 pre-menopausal women have considerable protection from numerous metabolic disease states  
323 [39], the prevalence of overweight/obesity is higher in women in all age groups [40]. Chronic *ad*  
324 *libtum* high-fat diet rodent studies of varying lengths have demonstrated that males and females  
325 gain similar amounts of body weight, with females having greater body fat percentages [41, 42].  
326 As expected, we observed less fat mass gain during HFHS feeding in mice with lower EB.  
327 Notably, females with higher weight adjusted EE and lower EB gained less fat mass than males.  
328 Our previous rat work also showed that higher weight adjusted EE was associated with reduced  
329 HFHS induced gains in fat mass [34, 43]. In humans, recent work demonstrated that low levels  
330 of physical activity EE are associated with reduced coupling of EI and increased fat mass gain  
331 [44]. Interestingly, 20°C female mice with increased EE were the only group to gain fat-free  
332 mass rather than fat mass during HFHS feeding. The observed increase in fat-free mass in the



333 20°C females represented over 80% of the body weight gain, compared to only ~30% for the  
334 other three groups. Relatively few studies have focused on changes in fat-free mass during  
335 overfeeding studies, but it is generally attributed to changes in total body water (reviewed in  
336 [45]). Though not reported, lean mass was determined during the body composition analysis  
337 and showed the same outcomes as calculated fat-free mass. Importantly, differences in body  
338 composition driven by ambient temperature and sex were only apparent during the HFHS  
339 feeding, illustrating the importance of EE to limit excessive weight gain and adiposity during  
340 consumption of energy dense diets [6-8].

341 The capacity to adapt energy metabolism to diet macronutrient composition through changes  
342 in substrate utilization and non-shivering thermogenesis likely drive susceptibility for obesity and  
343 metabolic disease and are thus a focus of treatment [10, 29, 30, 46-49]. Metabolic flexibility was  
344 initially described as the capacity to alter fuel utilization during the transition from fasting to fed  
345 states [50]. The initial investigation demonstrated that skeletal muscle of fasted lean subjects  
346 utilized more fat (lower RQ) and responded to insulin infusion with rapid increases in glucose  
347 utilization (higher RQ, metabolically flexible), while the obese subjects utilized less fat during  
348 fasting and did not increase glucose utilization in response to insulin (metabolically inflexible). In  
349 this study we observed that male and female mice with lower EE due to 30°C ambient housing  
350 have dramatically reduced metabolic flexibility on LFD compared to 20°C mice, and virtually no  
351 within day metabolic flexibility during the HFHS feeding. The LFD findings are significant in that  
352 no difference in average 24 hr RQ was observed between the temperature groups; however, the  
353 substantial difference in metabolic flexibility is driven by higher RQ in the dark cycle and lower  
354 RQ in the light cycle of the 20°C mice (data not shown). Based on differences in HFHS-induced  
355 weight gain between the 20°C and 30°C mice, our data suggests that reduced within-day  
356 metabolic flexibility is a predisposing factor to weight gain. Our data also shows that the degree  
357 of metabolic flexibility is highly associated with EE. This concept is supported by similar work  
358 demonstrating differences in metabolic flexibility in two mice strains with different susceptibility

359 to obesity [51]. The definition of metabolic flexibility has expanded to encompass adaptation of  
360 substrate utilization in response to changes in dietary macronutrient composition, including  
361 acute high-fat diet feeding [29]. Our previous work showed that rats with increased aerobic  
362 capacity and greater weight adjusted EE have a greater change in fat utilization (lower RQ) and  
363 greater total fatty acid oxidation during HFHS feeding [34]. In this study, while the HFHS feeding  
364 resulted in an immediate reduction in average daily RQ in all mice, the increased EE of 20°C  
365 mice was associated with greater change in average daily RQ following the dietary transition.  
366 Recently, the arcuate nucleus and ventromedial nucleus of the hypothalamus have been  
367 identified in the central control of metabolic flexibility during high-fat diet [52, 53], and regulation  
368 associated changes in EE [54]. Additional work is necessary to decipher how substrate  
369 availability and utilization interact with EE to alter central regulation of energy homeostasis and  
370 weight gain.

371 Non-shivering adaptive thermogenesis is the increased production of heat in response to  
372 either cold or diet stimuli [48]. Since the observation of thermogenic adipose depots in humans,  
373 and the discovery of skeletal muscle thermogenic capacity independent of contraction, many  
374 laboratories have explored the mechanisms of central regulation and activation required to  
375 produce heat uncoupled from oxidative phosphorylation as a fulcrum for obesity treatment  
376 (reviewed in [30, 48, 49]). While the efficacy of these approaches is still in question,  
377 understanding how diet-induced increases in EE may limit weight gain during acute energy  
378 surfeit is important [55]. Rodent work has highlighted the potential importance of diet-induced  
379 non-shivering thermogenesis through numerous findings of increased susceptibility or protection  
380 for diet-induced weight gain following knockout [56-59] or overexpression [60] of genes involved  
381 in various thermogenic pathways. In human subjects the major determinant for individual diet-  
382 induced thermogenesis is energy content [61]. However, obese subjects have lower diet-  
383 induced thermogenesis compared to lean [62] implicating reduced adaptability in EE as a  
384 mediator of weight gain. In this study we observed that 20°C females with higher EE having

385 greater 1-week HFHS diet-induced thermogenesis than 20°C males or the 30°C females. This  
386 greater adaptation of EE in the females to the HFHS diet was apparent in both the TEE and  
387 REE. In contrast, only the REE component adapted differently in males housed at 20°C and  
388 30°C. This was due, in part, to a greater diet-induced reduction in NREE in 20°C males than  
389 both 20°C females and 30°C males. The HFHS-induced non-shivering thermogenesis  
390 observations reported here are the first to show that EE and sex interact to alter systemic  
391 thermogenic response to energy dense diet. Estrogen signaling in the hypothalamus is  
392 important for regulation of energy homeostasis in females (Reviewed in [63, 64]), particularly in  
393 the ventromedial hypothalamus which is involved in regulation of diet-induced non-shivering  
394 thermogenesis. However, further studies are necessary to determine if increased diet-induced  
395 non-shivering thermogenesis in female mice is obligatory for their phenotype of reduced weight  
396 gain, and if estrogen signaling is critical for both processes. Overall, these findings support a  
397 role for diet-induced non-shivering thermogenesis in the reduced diet-induced fat mass gain in  
398 20°C mice with increased EE.

399

#### 400 **4.1 Limitations**

401 Despite the wide breadth of energy metabolism data collected during these experiments,  
402 several potentially confounding factors and limitations should be considered. First, while the  
403 C57Bl/6J mouse strain is extensively utilized in obesity studies, the use of other inbred and  
404 outbred mouse strains for future studies, particularly related to assessment of sex differences,  
405 are necessary. Second, the increased EE of mice at sub-thermoneutral ambient temperatures is  
406 primarily mediated by centrally regulated non-shivering thermogenic pathways in adipose and  
407 skeletal muscle. These pathways differ from those potentially activated through increased  
408 physical activity or exercise and may confound the findings. Further, from the data herein we  
409 can not determine the magnitude of activation of the different non-shivering thermogenic  
410 tissues, which could potentially differ by baseline EE or sex. Third, the assessment of diet-

411 induced weight gain in 9 – 11 week old mice could be confounded by the previously observed  
412 dependence of weight gain on age of diet initiation and sex [41]. Fourth, previous mouse work  
413 has demonstrated that male mice defend different body core temperatures at different ambient  
414 temperatures [27, 65]. The lack of these thermal biology data prevents a comprehensive  
415 dissection of sexual differences in energy metabolism, and the impact on metabolic responses  
416 to short-term HFHS feeding. Finally, the lack of fecal energy excretion data prevents the  
417 calculation of net energy intake during both the LFD and HFHS feeding, and potentially  
418 confounds the calculation of EB.

419

## 420 **4.2 Conclusions**

421 Because the prevention of weight gain is putatively easier than weight loss [6], it is critical that  
422 mechanisms underlying the protection or susceptibility to episodic weight gain during  
423 hypercaloric conditions be elucidated. This study used ambient temperature to determine if  
424 higher or lower EE in male and female mice would change metabolic adaptations and weight  
425 gain during a transition to acute HFHS feeding. Here we demonstrate that baseline EE and sex  
426 interact to impact diet-induced changes in body composition and weight gain. This interaction is  
427 a result of the observed inverse relationship between fat mass gain and weight-adjusted TEE,  
428 as well as, diet-induced non-shivering thermogenesis. These data offer further support that at  
429 higher levels of EE, there is enhanced coupling of EI to EE during HFHS, resulting in reduced  
430 positive energy balance and reduced gains in weight and adiposity. Additionally, these data  
431 demonstrate that EE level plays a role in the composition of weight gained by female mice  
432 during acute HFHS feeding. Finally, these findings have increased significance when one  
433 considers that the vast majority of obesity research conducted in mice occurs at sub-  
434 thermoneutral housing, near, the 20°C temperature.

## **Author Contributions**

Author contributions: EMM, JPT, conception and design of research; EMM, RDN, JAA, CSM performed experiments; EMM, QX, DCK, RPS, JRBL, analyzed data; EMM, RDN, JAA, CSM, RPS, JRBL, JAC, JPT, interpreted results of experiments; EMM prepared manuscript; EMM, RDN, JAA, CSM, QX, DCK, RPS, JRBL, JAC, JPT edited and revised manuscript.

## REFERENCES

1. Yanovski, J.A., S.Z. Yanovski, K.N. Sovik, T.T. Nguyen, P.M. O'Neil, and N.G. Sebring, *A prospective study of holiday weight gain*. *N Engl J Med*, 2000. **342**(12): p. 861-7.
2. Hull, H.R., D. Radley, M.K. Dinger, and D.A. Fields, *The effect of the Thanksgiving holiday on weight gain*. *Nutr J*, 2006. **5**: p. 29.
3. Ma, Y., B.C. Olendzki, W. Li, A.R. Hafner, D. Chiriboga, J.R. Hebert, et al., *Seasonal variation in food intake, physical activity, and body weight in a predominantly overweight population*. *Eur J Clin Nutr*, 2006. **60**(4): p. 519-28.
4. Racette, S.B., E.P. Weiss, K.B. Schechtman, K. Steger-May, D.T. Villareal, K.A. Obert, et al., *Influence of weekend lifestyle patterns on body weight*. *Obesity (Silver Spring)*, 2008. **16**(8): p. 1826-30.
5. Helander, E.E., B. Wansink, and A. Chieh, *Weight Gain over the Holidays in Three Countries*. *N Engl J Med*, 2016. **375**(12): p. 1200-2.
6. Hill, J.O., H.R. Wyatt, and J.C. Peters, *Energy balance and obesity*. *Circulation*, 2012. **126**(1): p. 126-32.
7. Blair, S.N., G.A. Hand, and J.O. Hill, *Energy balance: a crucial issue for exercise and sports medicine*. *Br J Sports Med*, 2015.
8. Hand, G.A., R.P. Shook, J.O. Hill, P.R. Giacobbi, and S.N. Blair, *Energy flux: staying in energy balance at a high level is necessary to prevent weight gain for most people*. *Expert Rev Endocrinol Metab*, 2015. **10**(6): p. 599-605.
9. Hill, J.O. and R. Commerford, *Physical activity, fat balance, and energy balance*. *Int J Sport Nutr*, 1996. **6**(2): p. 80-92.
10. Galgani, J. and E. Ravussin, *Energy metabolism, fuel selection and body weight regulation*. *Int J Obes (Lond)*, 2008. **32 Suppl 7**: p. S109-19.
11. Hopkins, M., A. Jeukendrup, N.A. King, and J.E. Blundell, *The relationship between substrate metabolism, exercise and appetite control: does glycogen availability influence the motivation to eat, energy intake or food choice?* *Sports Med*, 2011. **41**(6): p. 507-21.
12. Hariri, N. and L. Thibault, *High-fat diet-induced obesity in animal models*. *Nutr Res Rev*, 2010. **23**(2): p. 270-99.
13. Saper, C.B., T.C. Chou, and J.K. Elmquist, *The need to feed: homeostatic and hedonic control of eating*. *Neuron*, 2002. **36**(2): p. 199-211.
14. Organization, W.H., *Obesity and Overweight*. 2018.
15. American Diabetes, A., *3. Prevention or Delay of Type 2 Diabetes: Standards of Medical Care in Diabetes-2019*. *Diabetes Care*, 2019. **42**(Suppl 1): p. S29-S33.
16. American Diabetes, A., *5. Lifestyle Management: Standards of Medical Care in Diabetes-2019*. *Diabetes Care*, 2019. **42**(Suppl 1): p. S46-S60.
17. American Diabetes, A., *8. Obesity Management for the Treatment of Type 2 Diabetes: Standards of Medical Care in Diabetes-2019*. *Diabetes Care*, 2019. **42**(Suppl 1): p. S81-S89.
18. Jensen, M.D., D.H. Ryan, C.M. Apovian, J.D. Ard, A.G. Comuzzie, K.A. Donato, et al., *2013 AHA/ACC/TOS guideline for the management of overweight and obesity in adults: a report of the American College of Cardiology/American Heart Association Task Force on Practice Guidelines and The Obesity Society*. *Circulation*, 2014. **129**(25 Suppl 2): p. S102-38.
19. Gabriel, B.M. and J.R. Zierath, *The Limits of Exercise Physiology: From Performance to Health*. *Cell Metab*, 2017. **25**(5): p. 1000-1011.
20. Zanuso, S., M. Sacchetti, C.J. Sundberg, G. Orlando, P. Benvenuti, and S. Balducci, *Exercise in type 2 diabetes: genetic, metabolic and neuromuscular adaptations. A review of the evidence*. *Br J Sports Med*, 2017. **51**(21): p. 1533-1538.

21. Dulloo, A.G., J. Miles-Chan, Y. Schutz, and J.P. Montani, *Targeting lifestyle energy expenditure in the management of obesity and health: from biology to built environment*. *Obes Rev*, 2018. **19 Suppl 1**: p. 3-7.
22. Rosenfeld, C.S., *Sex-dependent differences in voluntary physical activity*. *J Neurosci Res*, 2017. **95**(1-2): p. 279-290.
23. Parker, B.A., M.J. Kalasky, and D.N. Proctor, *Evidence for sex differences in cardiovascular aging and adaptive responses to physical activity*. *Eur J Appl Physiol*, 2010. **110**(2): p. 235-46.
24. Lark, D.S., J.R. Kwan, P.M. McClatchey, M.N. James, F.D. James, J.R.B. Lighton, et al., *Reduced Nonexercise Activity Attenuates Negative Energy Balance in Mice Engaged in Voluntary Exercise*. *Diabetes*, 2018. **67**(5): p. 831-840.
25. Fletcher, J.A., M.A. Linden, R.D. Sheldon, G.M. Meers, E.M. Morris, A. Butterfield, et al., *Fibroblast growth factor 21 increases hepatic oxidative capacity but not physical activity or energy expenditure in hepatic peroxisome proliferator-activated receptor gamma coactivator-1alpha-deficient mice*. *Exp Physiol*, 2018. **103**(3): p. 408-418.
26. Luijten, I.H.N., K. Brooks, N. Boulet, I.G. Shabalina, A. Jaiprakash, B. Carlsson, et al., *Glucocorticoid-Induced Obesity Develops Independently of UCP1*. *Cell Rep*, 2019. **27**(6): p. 1686-1698 e5.
27. Abreu-Vieira, G., C. Xiao, O. Gavrilova, and M.L. Reitman, *Integration of body temperature into the analysis of energy expenditure in the mouse*. *Mol Metab*, 2015. **4**(6): p. 461-70.
28. *Dietary Guidelines For Americans*, D.o.A.D.o.H.a.H. Services, Editor. 2005.
29. Galgani, J.E., C. Moro, and E. Ravussin, *Metabolic flexibility and insulin resistance*. *Am J Physiol Endocrinol Metab*, 2008. **295**(5): p. E1009-17.
30. Chouchani, E.T., L. Kazak, and B.M. Spiegelman, *New Advances in Adaptive Thermogenesis: UCP1 and Beyond*. *Cell Metab*, 2018.
31. Mayer, J., N.B. Marshall, J.J. Vitale, J.H. Christensen, M.B. Mashayekhi, and F.J. Stare, *Exercise, food intake and body weight in normal rats and genetically obese adult mice*. *Am J Physiol*, 1954. **177**(3): p. 544-8.
32. Mayer, J., P. Roy, and K.P. Mitra, *Relation between caloric intake, body weight, and physical work: studies in an industrial male population in West Bengal*. *Am J Clin Nutr*, 1956. **4**(2): p. 169-75.
33. Blundell, J.E., C. Gibbons, P. Caudwell, G. Finlayson, and M. Hopkins, *Appetite control and energy balance: impact of exercise*. *Obes Rev*, 2015. **16 Suppl 1**: p. 67-76.
34. Morris, E.M., M.R. Jackman, G.C. Johnson, T.W. Liu, J.L. Lopez, M.L. Kearney, et al., *Intrinsic aerobic capacity impacts susceptibility to acute high-fat diet-induced hepatic steatosis*. *Am J Physiol Endocrinol Metab*, 2014. **307**(4): p. E355-64.
35. Blundell, J.E. and N.A. King, *Physical activity and regulation of food intake: current evidence*. *Med Sci Sports Exerc*, 1999. **31**(11 Suppl): p. S573-83.
36. Hagele, F.A., F. Busing, A. Nas, M. Hasler, M.J. Muller, J.E. Blundell, et al., *Appetite control is improved by acute increases in energy turnover at different levels of energy balance*. *J Clin Endocrinol Metab*, 2019.
37. Hopkins, M., C. Duarte, K. Beaulieu, G. Finlayson, C. Gibbons, A.M. Johnstone, et al., *Activity energy expenditure is an independent predictor of energy intake in humans*. *Int J Obes (Lond)*, 2019. **43**(7): p. 1466-1474.
38. Bredella, M.A., *Sex Differences in Body Composition*. *Adv Exp Med Biol*, 2017. **1043**: p. 9-27.
39. Palmer, B.F. and D.J. Clegg, *The sexual dimorphism of obesity*. *Mol Cell Endocrinol*, 2015. **402**: p. 113-9.
40. Ogden, C.L., M.D. Carroll, and K.M. Flegal, *Prevalence of obesity in the United States*. *JAMA*, 2014. **312**(2): p. 189-90.

41. Salinero, A.E., B.M. Anderson, and K.L. Zuloaga, *Sex differences in the metabolic effects of diet-induced obesity vary by age of onset*. *Int J Obes (Lond)*, 2018. **42**(5): p. 1088-1091.
42. Medrikova, D., Z.M. Jilkova, K. Bardova, P. Janovska, M. Rossmeisl, and J. Kopecky, *Sex differences during the course of diet-induced obesity in mice: adipose tissue expandability and glycemic control*. *Int J Obes (Lond)*, 2012. **36**(2): p. 262-72.
43. Morris, E.M., Meers, G.M.E., Koch, L.G., Britton, S.L., MacLean, P.S., Thyfault, J.P., *Increased Aerobic Capacity Reduces Susceptibility to Acute High-fat Diet-induced Weight Gain*. *Obesity (Silver Spring)*, 2016. **In Press**.
44. Shook, R.P., G.A. Hand, C. Drenowatz, J.R. Hebert, A.E. Paluch, J.E. Blundell, et al., *Low levels of physical activity are associated with dysregulation of energy intake and fat mass gain over 1 year*. *Am J Clin Nutr*, 2015. **102**(6): p. 1332-8.
45. Leaf, A. and J. Antonio, *The Effects of Overfeeding on Body Composition: The Role of Macronutrient Composition - A Narrative Review*. *Int J Exerc Sci*, 2017. **10**(8): p. 1275-1296.
46. Goodpaster, B.H. and L.M. Sparks, *Metabolic Flexibility in Health and Disease*. *Cell Metab*, 2017. **25**(5): p. 1027-1036.
47. Smith, R.L., M.R. Soeters, R.C.I. Wust, and R.H. Houtkooper, *Metabolic Flexibility as an Adaptation to Energy Resources and Requirements in Health and Disease*. *Endocr Rev*, 2018. **39**(4): p. 489-517.
48. Palmer, B.F. and D.J. Clegg, *Non-shivering thermogenesis as a mechanism to facilitate sustainable weight loss*. *Obes Rev*, 2017. **18**(8): p. 819-831.
49. Valente, A., A.Z. Jamurtas, Y. Koutedakis, and A.D. Flouris, *Molecular pathways linking non-shivering thermogenesis and obesity: focusing on brown adipose tissue development*. *Biol Rev Camb Philos Soc*, 2015. **90**(1): p. 77-88.
50. Kelley, D.E., B. Goodpaster, R.R. Wing, and J.A. Simoneau, *Skeletal muscle fatty acid metabolism in association with insulin resistance, obesity, and weight loss*. *Am J Physiol*, 1999. **277**(6 Pt 1): p. E1130-41.
51. Bardova, K., O. Horakova, P. Janovska, J. Hansikova, V. Kus, E.M. van Schothorst, et al., *Early differences in metabolic flexibility between obesity-resistant and obesity-prone mice*. *Biochimie*, 2016. **124**: p. 163-170.
52. Reichenbach, A., R. Stark, M. Mequinion, R.R.G. Denis, J.F. Goularte, R.E. Clarke, et al., *AgRP Neurons Require Carnitine Acetyltransferase to Regulate Metabolic Flexibility and Peripheral Nutrient Partitioning*. *Cell Rep*, 2018. **22**(7): p. 1745-1759.
53. Cardinal, P., C. Andre, C. Quarta, L. Bellocchio, S. Clark, M. Elie, et al., *CB1 cannabinoid receptor in SF1-expressing neurons of the ventromedial hypothalamus determines metabolic responses to diet and leptin*. *Mol Metab*, 2014. **3**(7): p. 705-16.
54. Lee, J.H., L. Lin, P. Xu, K. Saito, Q. Wei, A.G. Meadows, et al., *Neuronal Deletion of Ghrelin Receptor Almost Completely Prevents Diet-Induced Obesity*. *Diabetes*, 2016. **65**(8): p. 2169-78.
55. Rothwell, N.J. and M.J. Stock, *A role for brown adipose tissue in diet-induced thermogenesis*. *Nature*, 1979. **281**(5726): p. 31-5.
56. Kazak, L., E.T. Chouchani, G.Z. Lu, M.P. Jedrychowski, C.J. Bare, A.I. Mina, et al., *Genetic Depletion of Adipocyte Creatine Metabolism Inhibits Diet-Induced Thermogenesis and Drives Obesity*. *Cell Metab*, 2017. **26**(4): p. 693.
57. Rowland, L.A., S.K. Maurya, N.C. Bal, L. Kozak, and M. Periasamy, *Sarcoplipin and uncoupling protein 1 play distinct roles in diet-induced thermogenesis and do not compensate for one another*. *Obesity (Silver Spring)*, 2016. **24**(7): p. 1430-3.
58. Feldmann, H.M., V. Golozoubova, B. Cannon, and J. Nedergaard, *UCP1 ablation induces obesity and abolishes diet-induced thermogenesis in mice exempt from thermal stress by living at thermoneutrality*. *Cell Metab*, 2009. **9**(2): p. 203-9.



59. von Essen, G., E. Lindsund, B. Cannon, and J. Nedergaard, *Adaptive facultative diet-induced thermogenesis in wild-type but not in UCP1-ablated mice*. Am J Physiol Endocrinol Metab, 2017. **313**(5): p. E515-E527.
60. Maurya, S.K., N.C. Bal, D.H. Sopariwala, M. Pant, L.A. Rowland, S.A. Shaikh, et al., *Sarcosine Is a Key Determinant of the Basal Metabolic Rate, and Its Overexpression Enhances Energy Expenditure and Resistance against Diet-induced Obesity*. J Biol Chem, 2015. **290**(17): p. 10840-9.
61. Westerterp, K.R., *Diet induced thermogenesis*. Nutr Metab (Lond), 2004. **1**(1): p. 5.
62. de Jonge, L. and G.A. Bray, *The thermic effect of food and obesity: a critical review*. Obes Res, 1997. **5**(6): p. 622-31.
63. Mauvais-Jarvis, F., D.J. Clegg, and A.L. Hevener, *The role of estrogens in control of energy balance and glucose homeostasis*. Endocr Rev, 2013. **34**(3): p. 309-38.
64. Xu, Y. and M. Lopez, *Central regulation of energy metabolism by estrogens*. Mol Metab, 2018. **15**: p. 104-115.
65. Tokizawa, K., T. Yoda, Y. Uchida, K. Kanosue, and K. Nagashima, *Estimation of the core temperature control during ambient temperature changes and the influence of circadian rhythm and metabolic conditions in mice*. J Therm Biol, 2015. **51**: p. 47-54.

## Figure Legends

### **Figure 1: Divergent energy metabolism in mice due to different ambient housing temperature produces sexually dimorphic HFHS-induced weight gain.**

A) Indirect calorimetry was utilized to determine one week total energy expenditure (TEE) in male and female C57Bl/6J mice during 7-days of LFD followed by 7-days of HFHS (n=10-16). B) Energy intake (EI) during each dietary exposure was determined as the sum of food intake (g) times the energy density (kcal/g) for each diet (n=7-16). C) Energy balance was calculated as difference in EI and TEE for each mouse during each diet exposure (n=7-16). D) One week change in body weight (n=10-16). Values are means  $\pm$  SEM. %  $p < 0.05$  main effect of 20°C vs. 30°C, +  $p < 0.05$  main effect of LFD vs. HFHS, ††  $p < 0.05$  male vs. female within temperature by diet group, %%  $p < 0.05$  20°C vs. 30°C within sex by diet group.

### **Figure 2: Higher energy metabolism during 20°C housing changes type of weight gained in female mice during one week HFHS feeding.**

Body composition analysis utilizing qMRI was performed before and after each diet exposure. The difference in the initial and final values during the one week of LFD and HFHS are displayed as (A) change in fat mass (FM) and (B) fat-free mass (FFM). C) One week change in body weight presented as change in FM and FFM. D) Metabolic efficiency as the percent of EI stored as FM and FFM. Values are means  $\pm$  SEM. n=10-16. %  $p < 0.05$  main effect of 20°C vs. 30°C, +  $p < 0.05$  main effect of LFD vs. HFHS, ††  $p < 0.05$  male vs. female within temperature by diet group, %%  $p < 0.05$  20°C vs. 30°C within sex by diet group. ++  $p < 0.05$  LFD vs. HFHS within temperature by sex group.

### **Figure 3: Component analysis of total energy expenditure.**

A) Indirect calorimetry was utilized to determine one week resting energy expenditure (REE) in male and female C57Bl/6J mice during 7-days of LFD followed by 7-days of HFHS. B) Non-resting energy expenditure (NREE) was calculated as the difference between TEE and REE over the 7-day dietary

exposures. C) TEE represented as the components: ■ REE & □ NREE. D) Percent of TEE comprised of ■ REE & □ NREE. Values are means  $\pm$  SEM.  $n=10-16$ . %  $p<0.05$  main effect of 20°C vs. 30°C, +  $p<0.05$  main effect of LFD vs. HFHS, ††  $p<0.05$  male vs. female within temperature by diet group, %%  $p<0.05$  20°C vs. 30°C within sex by diet group, ++  $p<0.05$  LFD vs. HFHS within temperature by sex group.

**Figure 4: Female mice have greater total energy expenditure and equal energy intake following co-variate analysis by fat and fat-free mass.** A) TEE ( $n=10-12$ ) and B) EI ( $n=8-12$ ) following ANCOVA for fat mass + fat-free mass is expressed as the estimated mean  $\pm$  SEM. Estimated effect size of the significant covariates for each ANCOVA analysis are presented as partial eta squared. %  $p<0.05$  main effect of 20°C vs. 30°C, +  $p<0.05$  main effect of LFD vs. HFHS, †  $p<0.05$  main effect of male vs. female.

**Figure 5: Divergent energy metabolism in mice due to different ambient housing temperature produces differences in metabolic flexibility on both low-fat and high-fat/high-sucrose diets.** A) Indirect calorimetry was utilized to determine average daily respiratory quotient (RQ). Metabolic flexibility was assessed as: B) the daily difference between dark cycle RQ minus light cycle RQ averaged across the dietary exposures and C) the difference in average daily RQ during HFHS feeding and average daily RQ during LFD feeding. D) RQ change from LFD RQ during each day of the HFHS exposure. Values are means  $\pm$  SEM.  $n=10-16$ . +  $p<0.05$  main effect of LFD vs. HFHS, %  $p<0.05$  main effect of 20°C vs. 30°C, ††  $p<0.05$  male vs. female within temperature by diet group.

**Figure 6: Energy metabolism and sex interact impacting high-fat/high-sucrose-induced changes in energy expenditure.** HFHS-induced changes in A) TEE, B) REE, and C) NREE

were calculated as the difference between the one week HFHS values and the one week LFD values. D) Daily HFHS-induced change in REE above LFD REE. Values are means  $\pm$  SEM. n=10-16. %  $p < 0.05$  main effect of 20°C vs. 30°C, ††  $p < 0.05$  male vs. female within temperature by diet group, %%  $p < 0.05$  20°C vs. 30°C within sex by diet group.

**Figure 7: Different ambient housing temperatures does not result in different activity levels, and activity energy expenditure does not associate with the observed changes in body weight or body composition.** A) Thermic effect of food (TEF) was determined from weekly food intake and macronutrient composition of each diet, and B) activity energy expenditure (AEE) was calculated as the difference in NREE and TEF (n=9-16). Total cage activity was determined as (C) All\_Meters (n=10-16), and the (D) cost of movement (CoM) was calculated as the AEE divided by the cage activity (n=9-15). Values are means  $\pm$  SEM. %  $p < 0.05$  main effect of 20°C vs. 30°C, +  $p < 0.05$  main effect of LFD vs. HFHS, †  $p < 0.05$  main effect of male vs. female, ††  $p < 0.05$  male vs. female within temperature by diet group, %%  $p < 0.05$  20°C vs. 30°C within sex by diet group, ++  $p < 0.05$  LFD vs. HFHS within temperature by sex group.

Figure 1

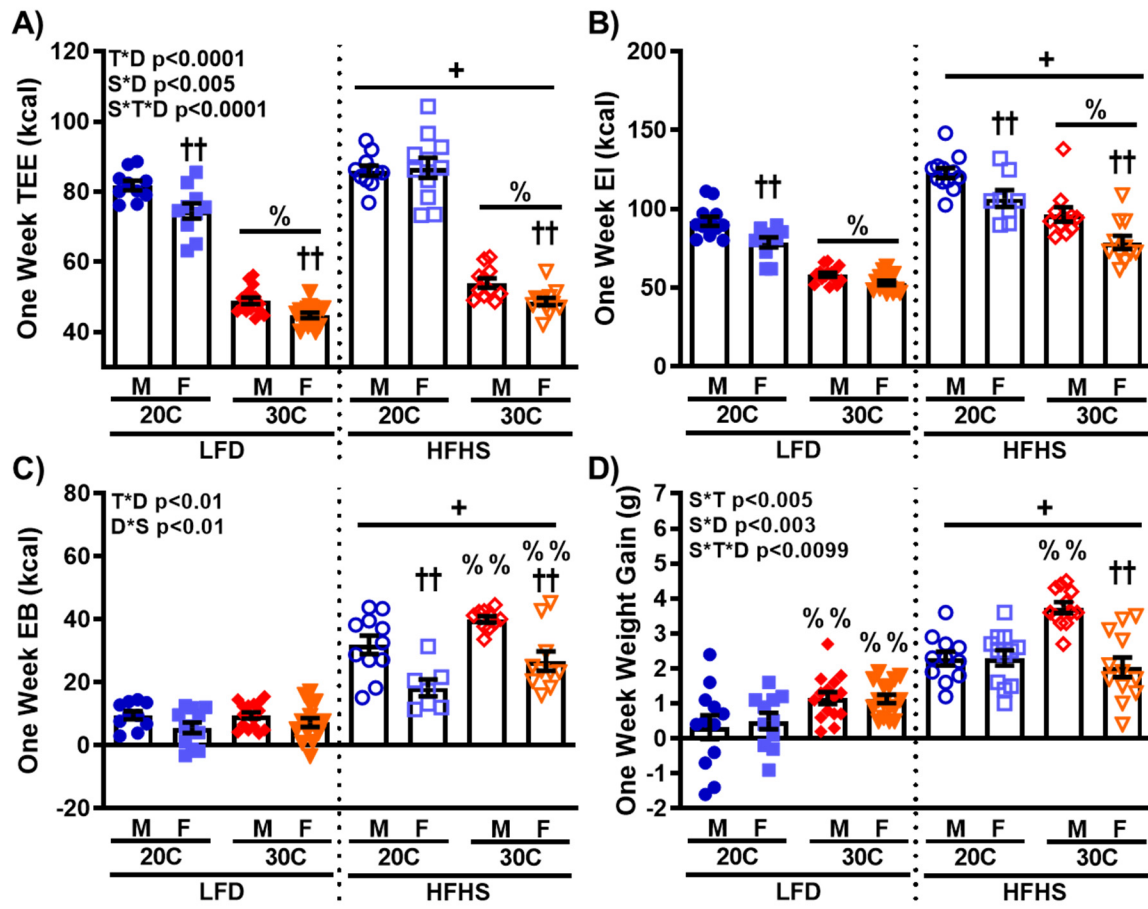

Figure 2

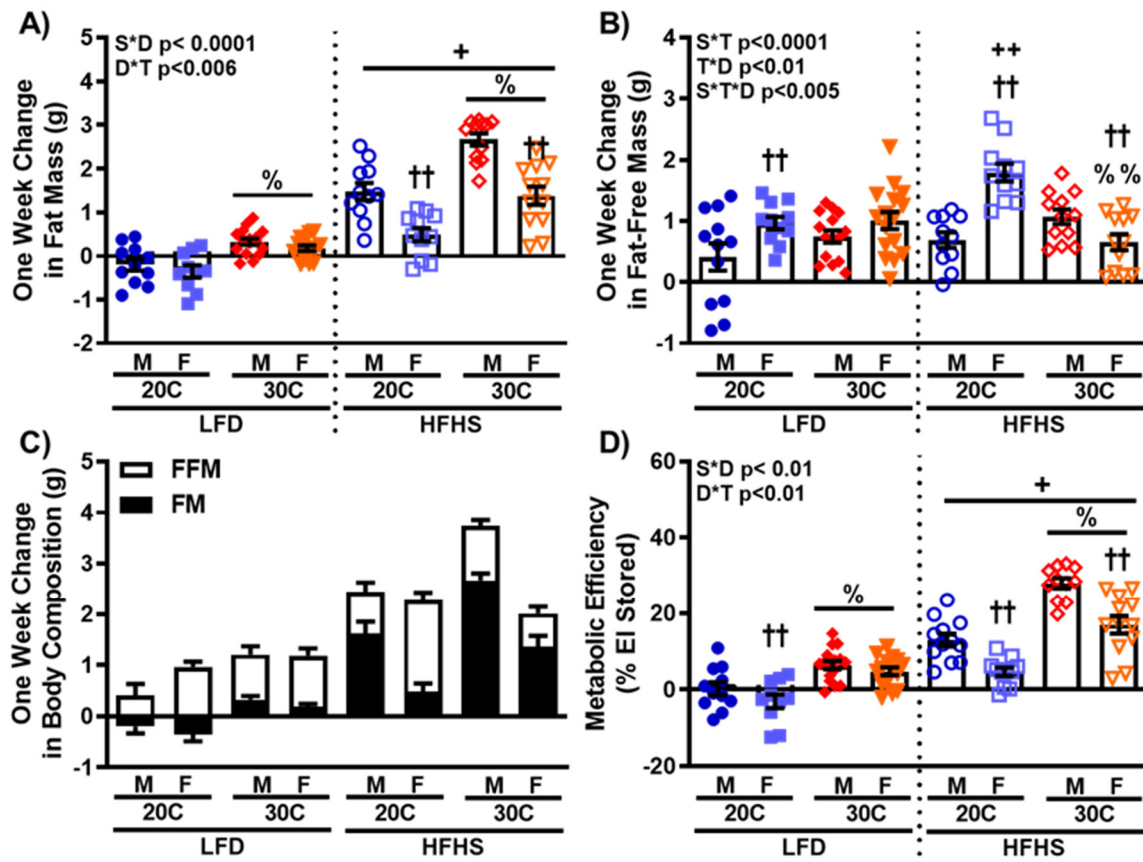

Figure 3

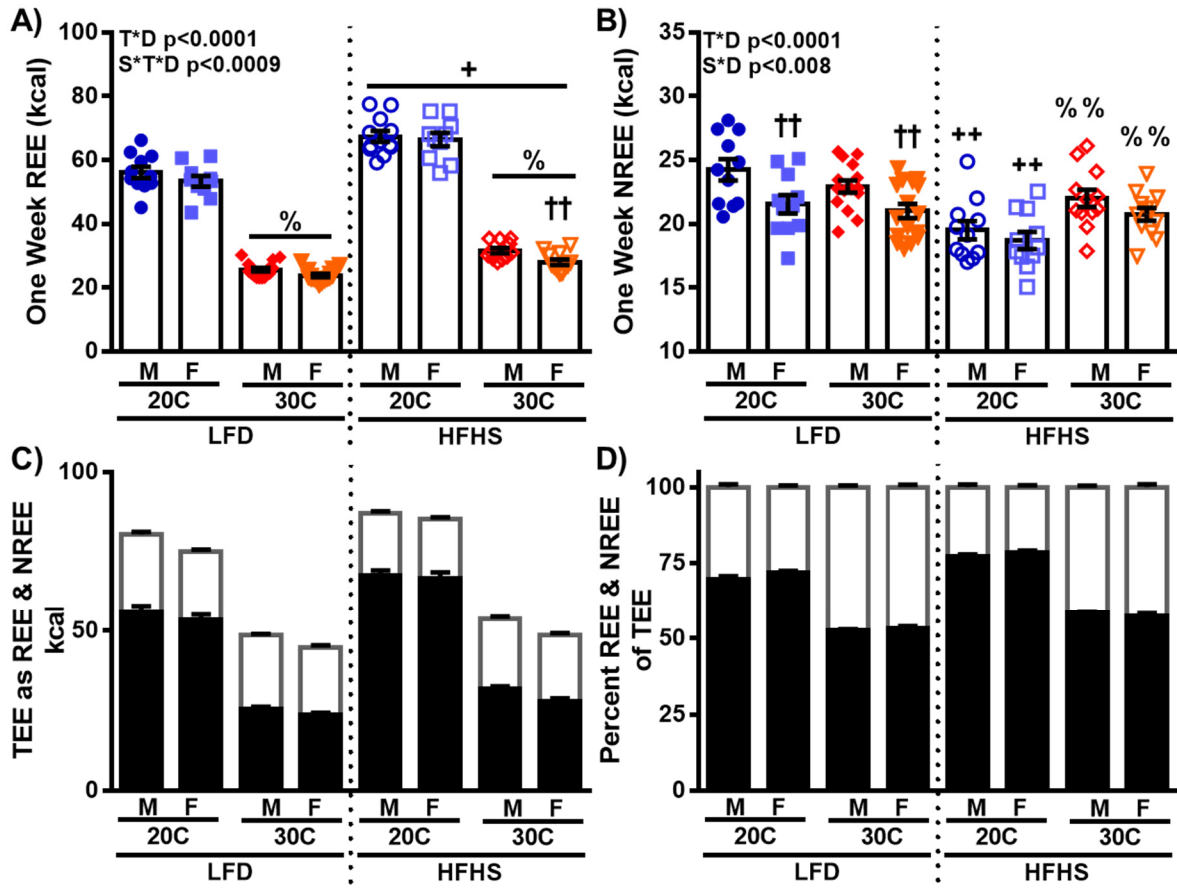

Figure 4

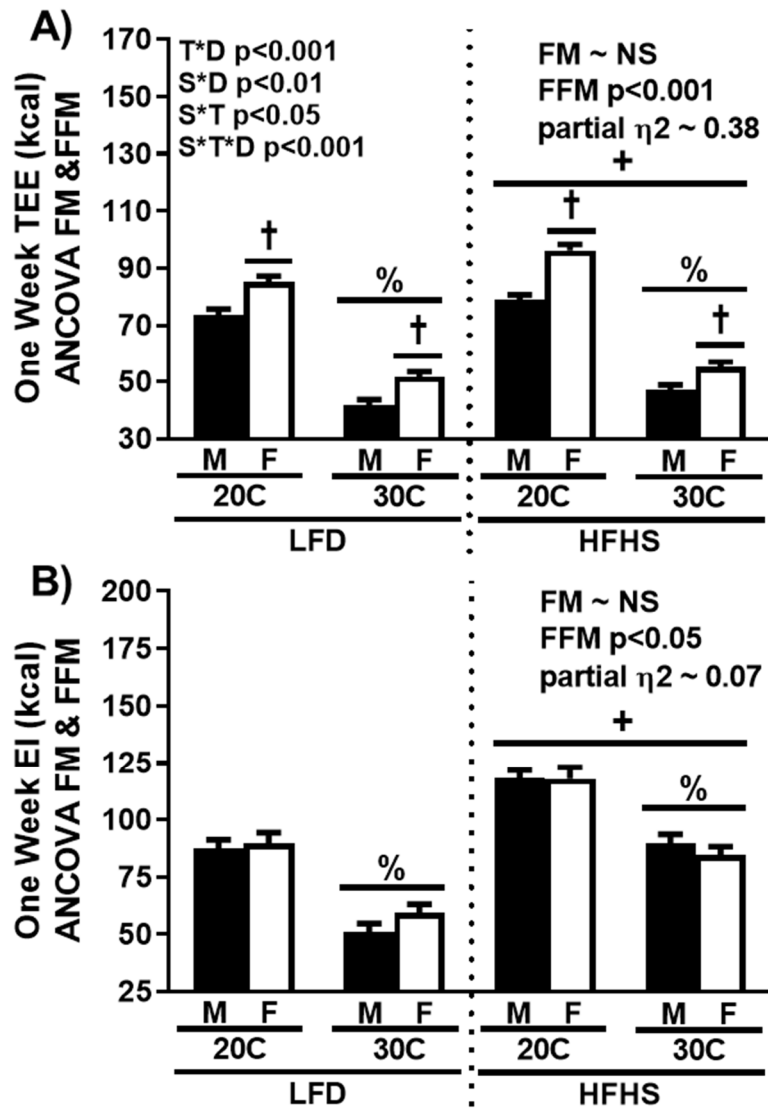



Figure 5

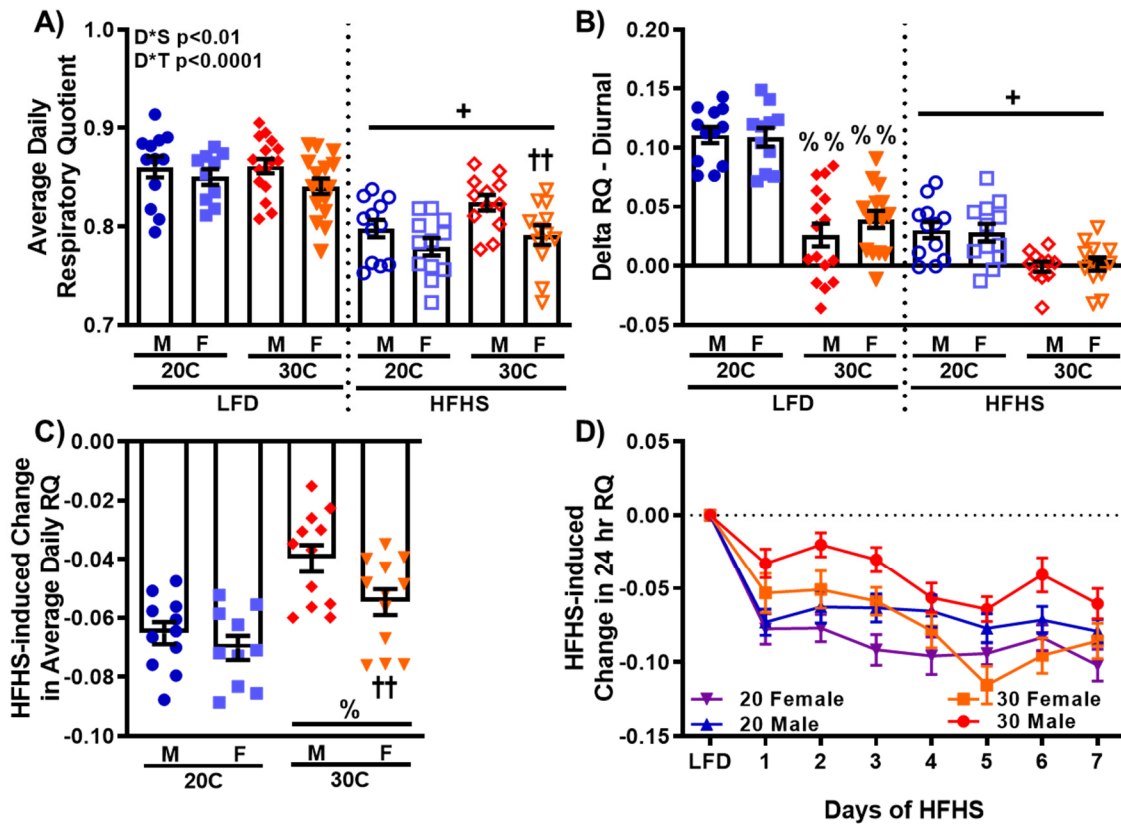

Figure 6

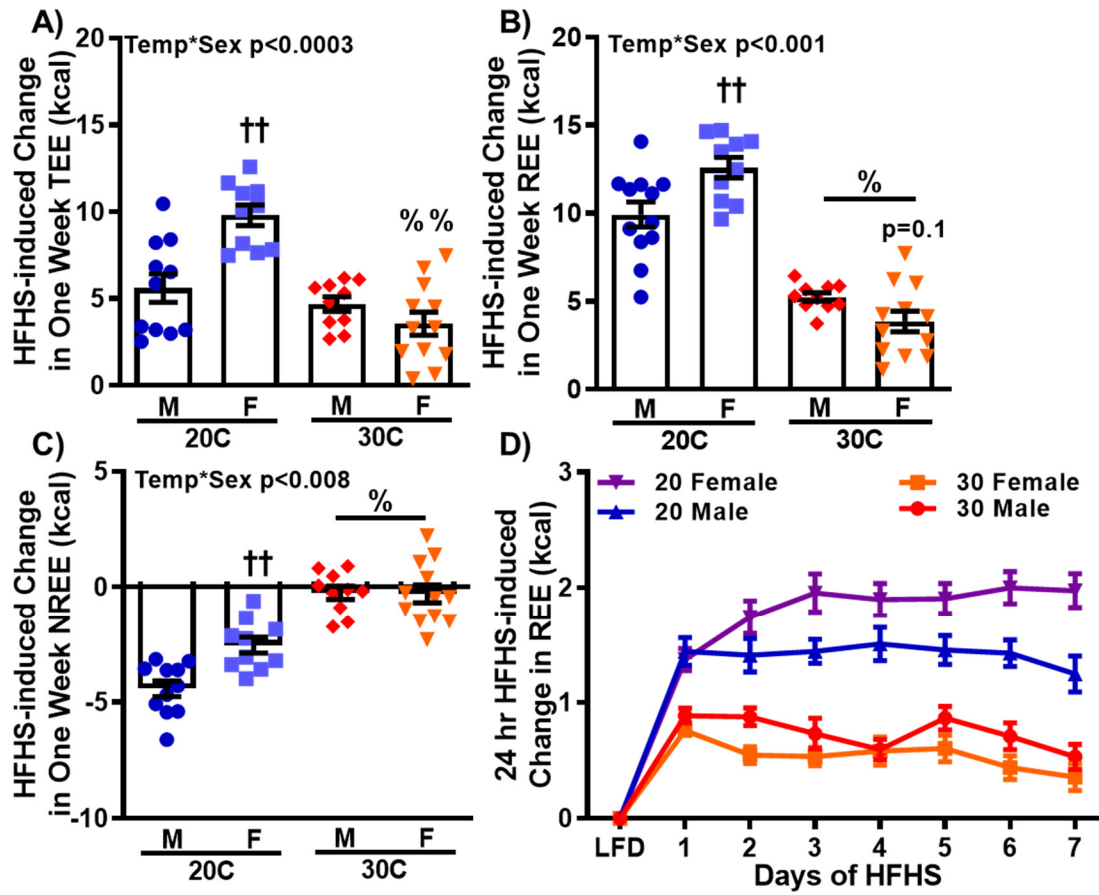

Figure 7

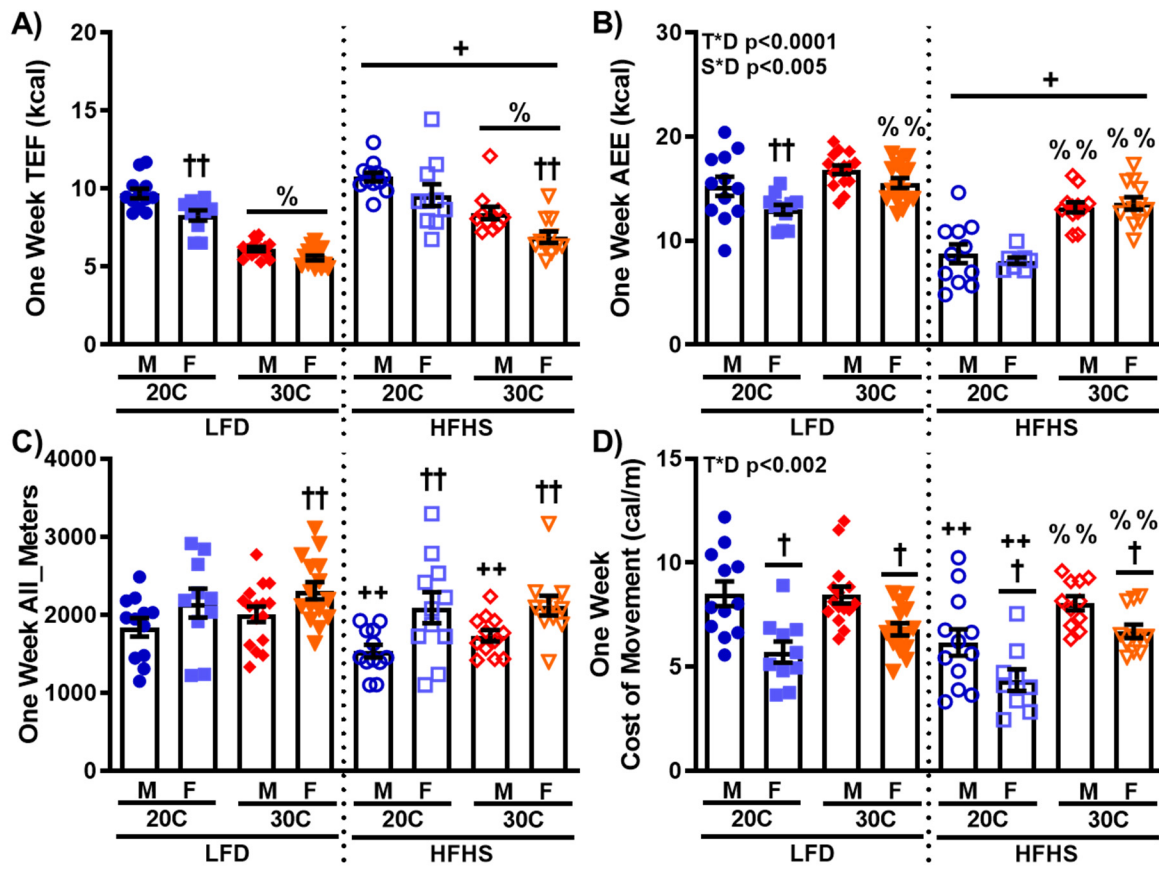

Source: https://biorxiv.org/content/biorxiv/early/2019/11/13/840702.full-text.pdf
